# Supplementary material for: Red fluorescent cross-linked glycopolymer nanoparticles based on aggregation induced emission dyes for cell imaging
Source: Royal Society of Chemistry journal article supplement (doi:10.1039/c4py01452a), 2014-11-27
Supplement: c4py01452a1.pdf [file c4py01452a1.pdf]

## Electronic Supplementary Information (ESI)

### Red fluorescent cross-linked glycopolymer nanoparticles based on aggregation induced emission dyes for cell imaging

Ke Wang,<sup>a</sup> Xiaoyong Zhang,<sup>a,b</sup> Xiqi Zhang,<sup>a</sup> Bin Yang,<sup>a</sup> Zhen Li,<sup>a</sup> Qingsong Zhang,<sup>a</sup>  
Zengfang Huang,<sup>a</sup> Yen Wei<sup>\*a</sup>

<sup>a</sup> Department of Chemistry and Key Laboratory of Bioorganic Phosphorus Chemistry & Chemical Biology (Ministry of Education), Tsinghua University, Beijing, 100084, China. E-mail: wangke007@iccas.ac.cn, weiyen@tsinghua.edu.cn; Fax: +86(10)6277-1149; Tel: +86(10)6277-2674

<sup>b</sup> Department of Chemistry/Institute of Polymers, Nanchang University, 999 Xuefu Avenue, Nanchang, 330031, China

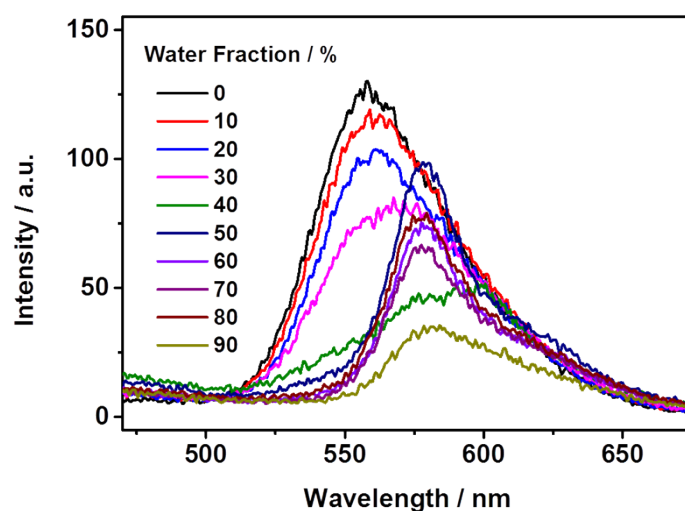

Fig. S1 Fluorescence spectra of R-ITA-Glu in THF and THF/water mixtures ( $\lambda_{\text{exc}} = 365 \text{ nm}$ ).

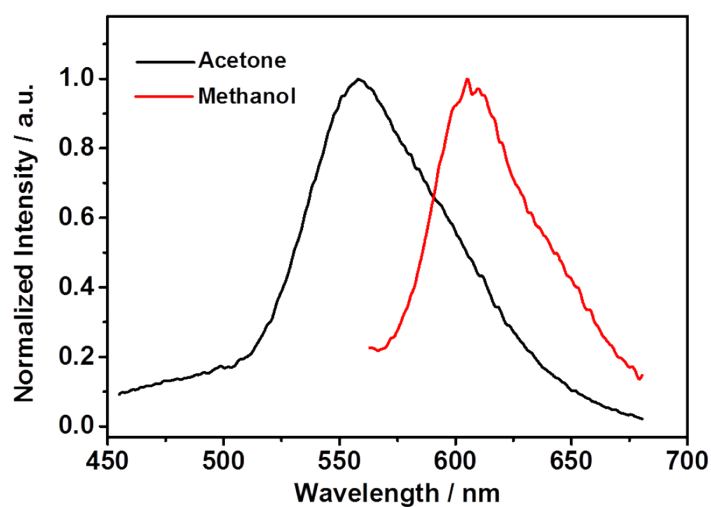

Fig. S2 Normalized fluorescence spectra R-ITA-Glu in different solvents.
